# Supplementary material
Source: publisher figshare collection journal article supplement (https://asha.figshare.com/articles/dataset/_/26170006)
Supplement: Supplementary file 1 [file 2]

**Supplemental Material S3.** Language treatment program details for included studies.

| Study                 | Language target                       | Program description                                                                                                                                                                                                                                                                                                                                                                                                                                       | Dosage summary                                                                                 | Time from pre- to post-testing |
|-----------------------|---------------------------------------|-----------------------------------------------------------------------------------------------------------------------------------------------------------------------------------------------------------------------------------------------------------------------------------------------------------------------------------------------------------------------------------------------------------------------------------------------------------|------------------------------------------------------------------------------------------------|--------------------------------|
| Aguilar et al. (2017) | Vocabulary/Word Learning (Artificial) | <ul style="list-style-type: none"> <li>• Various learning activities (e.g., building a robot, going on a pirate treasure hunt)</li> <li>• Exposed to target words in a naturalistic and meaningful context</li> </ul>                                                                                                                                                                                                                                     | 8 novel words, average 12 minutes per activity, 1 activity per session, 3 sessions for 3 weeks | 6 weeks                        |
| Anderson (2001)       | Grammatical Morphemes (Artificial)    | <ul style="list-style-type: none"> <li>• Imitation group: directly asked to repeat given sentences.</li> <li>• Modeling group: asked to relay what they heard to a doll.</li> </ul>                                                                                                                                                                                                                                                                       | 13 verb forms, 52 opportunities, 1 session                                                     | N/A                            |
| Bishop & Hsu (2015)   | Vocabulary/Word Learning (Artificial) | <ul style="list-style-type: none"> <li>• Training session: presenting all the animals (target words) with the corresponding pictures twice.</li> <li>• Verbal vocabulary learning task: Listening to animals' names with corresponding pictures and selecting the picture that goes with what they heard.</li> <li>• Nonverbal paired associating learning task: replacing target words with non-speech sounds and the corresponding pictures.</li> </ul> | 8 target words, 15-20 minutes per session, 4 sessions for 2 weeks                              | 2 weeks                        |
| Botting et al. (2016) | General Language Enrichment (Real)    | <ul style="list-style-type: none"> <li>• All age groups: recalling group rule, turn-taking, speaking, and understanding activities.</li> <li>• 4- to 5-year-olds: focused on the names of animals</li> <li>• 5- to 6-year-olds: focused on matching animal pictures along with prepositions</li> <li>• 6- to 7-year-olds: focused on categorizing pictures into groups</li> </ul>                                                                         | 45 minutes per session, once a week for 6 weeks                                                | 6 weeks                        |

|                           |                                                                                         |                                                                                                                                                                                                                                                                                                                                                                                                                                                              |                                                                 |                     |
|---------------------------|-----------------------------------------------------------------------------------------|--------------------------------------------------------------------------------------------------------------------------------------------------------------------------------------------------------------------------------------------------------------------------------------------------------------------------------------------------------------------------------------------------------------------------------------------------------------|-----------------------------------------------------------------|---------------------|
| Boyle et al. (2007)       | Multiple targets (Real):<br>Vocabulary/Word Learning, Grammatical Morphemes, Narratives | <ul style="list-style-type: none"> <li>Activities varied: focused on comprehension, vocabulary, grammar, and narrative.</li> </ul>                                                                                                                                                                                                                                                                                                                           | 30-40 minutes per session, 3 sessions per week over 15 weeks    | Average 6.59 months |
| Calder et al. (2021)      | Grammatical Morphemes (Real)                                                            | <ul style="list-style-type: none"> <li>Explicit instructions on regular past tense verbs were embedded in age-appropriate and engaging activities.</li> </ul>                                                                                                                                                                                                                                                                                                | 50 trials, 20-30 minutes per session, twice a week for 10 weeks | 10 weeks            |
| Clark (2006)              | General Language Enrichment (Real)                                                      | <ul style="list-style-type: none"> <li>Individual Language Intervention (ILI): story books to focus on semantics, syntax, narration, and phonological awareness.</li> <li>Computer Assisted Language Intervention (CALI): computerized games to target phonological awareness, recalling, and comprehension of complex sentences.</li> <li>Fast Forward Language (FFW-L): similar CALI's computerized games, but with the acoustic modifications.</li> </ul> | 100 minutes per session, 5 sessions a week for 6 weeks          | 6 weeks             |
| Durrleman & Delage (2020) | Linguistic Structure (Real)                                                             | <ul style="list-style-type: none"> <li>Selected images show on iPads to present complement, and children repeat the complement for approximately 100 different items.</li> </ul>                                                                                                                                                                                                                                                                             | 30 minutes per session, 8-12 sessions                           | 4-6 weeks           |
| Ebert & Pham (2023)       | Multiple targets (Real):<br>Vocabulary/Word Learning; Grammatical Morphemes             | <ul style="list-style-type: none"> <li>A combination of interactive activities and computer programs for all conditions</li> </ul>                                                                                                                                                                                                                                                                                                                           | 75 minutes per session, 4 sessions a week for 6 weeks           | 8 weeks             |

|                                 |                                       |                                                                                                                                                                                                                                                                                                                                                                                                                                                       |                                                                                                                         |                   |
|---------------------------------|---------------------------------------|-------------------------------------------------------------------------------------------------------------------------------------------------------------------------------------------------------------------------------------------------------------------------------------------------------------------------------------------------------------------------------------------------------------------------------------------------------|-------------------------------------------------------------------------------------------------------------------------|-------------------|
| Finestack (2018)                | Grammatical Morphemes (Artificial)    | <ul style="list-style-type: none"> <li>The space creature's language was presented on computer.</li> <li>Engage in cloze procedure tasks on computer with feedback.</li> <li>Explicit Intervention group received the rule of the novel morphemes throughout the activities.</li> </ul>                                                                                                                                                               | 3 different novel morphemes, 16 models/prompts per target, 20 minutes per session, once a day for average 4 weeks       | 17 days           |
| Finestack & Fey (2007)          | Grammatical Morphemes (Artificial)    | <ul style="list-style-type: none"> <li>Introduced to an outer space creature, TiKi, and its language.</li> <li>Auditory bombardment activity where children watched and listened.</li> <li>Sentence completion activity while looking at the stimulus and pictures.</li> <li>Explicit Intervention group received the rule of the novel morphemes throughout the activities.</li> <li>Modeling and recasting were provided for all groups.</li> </ul> | 20 models or recast prompts for targeted morpheme, 4 sessions in 2 weeks                                                | Average 9.19 days |
| Gray (2005)                     | Vocabulary/Word Learning (Artificial) | <ul style="list-style-type: none"> <li>Play activity involving an adventure or camping scenarios to present and teach target words: modeling, imitation prompt, comprehension questions, phonological cue, and production trial.</li> </ul>                                                                                                                                                                                                           | 4 target words, 24 models per session, 30 minutes per session, daily for 19 days with 4 days of break from day 10 to 13 | 5 days            |
| Gray (2003)                     | Vocabulary/Word Learning (Artificial) | <ul style="list-style-type: none"> <li>Play activities with playdough and western wagon set figurines to present and teach target words: modeling, imitation prompt, comprehension questions, and production trial.</li> </ul>                                                                                                                                                                                                                        | 4 target words, 24 exposures per session, 30 minutes per session, a total of five sessions in average 8.9 days          | Average 8.9 days  |
| Gutiérrez-Clellen et al. (2012) | General Language Enrichment (Real)    | <ul style="list-style-type: none"> <li>Book reading and hands-on activities (e.g., pictures, manipulatives, etc.).</li> <li>Simple phrases, slow rate of speech, recasting, and paralinguistic cues were utilized throughout the intervention.</li> </ul>                                                                                                                                                                                             | 45 minutes per session, 4 days a week for 12 weeks                                                                      | 12 weeks          |

|                        |                                                                   |                                                                                                                                                                                                                                                                                                                                                                          |                                                                                         |         |
|------------------------|-------------------------------------------------------------------|--------------------------------------------------------------------------------------------------------------------------------------------------------------------------------------------------------------------------------------------------------------------------------------------------------------------------------------------------------------------------|-----------------------------------------------------------------------------------------|---------|
| Haebig et al. (2022)   | Vocabulary/Word Learning (Artificial)                             | <ul style="list-style-type: none"> <li>• Stimuli were presented by a computer presentation program.</li> <li>• Study trials: names, definitions, and associated pictures were presented.</li> <li>• Retrieval trials: names and definitions were asked while presenting referent pictures.</li> </ul>                                                                    | 12 novel words, 24 exposures, 25 minutes per session for 4 sessions                     | 1 day   |
| Hsu & Bishop (2014)    | Multiple targets (Artificial): Sentence Complexity; Comprehension | <ul style="list-style-type: none"> <li>• In a game-like format, target sentences were presented with corresponding pictures.</li> <li>• Asked to move pictures accordingly to presented sentences.</li> <li>• Visual cues were provided as needed.</li> </ul>                                                                                                            | 12 exposures per session, 5-7 minutes per session for 4 sessions within 4-6 days        | 2 weeks |
| Jackson et al. (2021)  | Vocabulary/Word Learning (Artificial)                             | <ul style="list-style-type: none"> <li>• Target nouns were presented via an online program along with animation.</li> <li>• Prompted to imitate and repeat the target words.</li> <li>• Recast was provided after the child's response.</li> </ul>                                                                                                                       | 8 novel words, 20-30 minutes per session, a total of 3 sessions, 1 session per 1-3 days | 4 days  |
| Kapa et al. (2020)     | Grammatical Morphemes (Real)                                      | <ul style="list-style-type: none"> <li>• Conversational recasts throughout a variety of activities (e.g., games, arts and crafts, books, pretend play, etc.) to promote high variability.</li> <li>• Establishing eye contact and grabbing child's attention before recast.</li> </ul>                                                                                   | 30 minutes per session, 5 days per week for 5 weeks                                     | 5 weeks |
| Korat et al. (2019)    | Vocabulary/Word Learning (Real)                                   | <ul style="list-style-type: none"> <li>• Using e-books with a dictionary help function.</li> <li>• Animations were presented while providing a definition of target words.</li> <li>• Definitions were provided in three formats: simple dictionary definition, short contextual example, and a combination of dictionary definition and contextual sentence.</li> </ul> | 9 target words, 10 minutes per session, 1 session per 1-3 days for 5 sessions           | N/A     |
| Krzemien et al. (2021) | Grammatical Morphemes (Artificial)                                | <ul style="list-style-type: none"> <li>• A video with an alien teaching its language.</li> <li>• High variability group: 8 unique sentences with no words in common were presented.</li> </ul>                                                                                                                                                                           | 15 minutes for one session                                                              | N/A     |

|                             |                                          |                                                                                                                                                                                                                                                                                                                                                                                                                                                                                 |                                                                                                   |                          |
|-----------------------------|------------------------------------------|---------------------------------------------------------------------------------------------------------------------------------------------------------------------------------------------------------------------------------------------------------------------------------------------------------------------------------------------------------------------------------------------------------------------------------------------------------------------------------|---------------------------------------------------------------------------------------------------|--------------------------|
| Leonard et al.<br>(2019)    | Vocabulary/Word Learning<br>(Artificial) | <ul style="list-style-type: none"> <li>Progressive alignment group: 2-5 sentences were replaced with words in common.</li> <li>Learning block: Watched a pre-recorded video and audio describing the novel words with corresponding pictures were presented on a laptop.</li> <li>Completed a cloze procedure task after the learning block.</li> </ul>                                                                                                                         | 44 exposures for both sessions, 10 minutes per block session, 2 block sessions per day for a week | 5-minute and 1 week      |
|                             | Vocabulary/Word Learning<br>(Artificial) | <ul style="list-style-type: none"> <li>Presented with nine cartoon characters representing target novel words in semi-standardized game tasks.</li> <li>Three characters were introduced with their names and the appropriate iconic gesture.</li> <li>Three characters were introduced with their names and arbitrary gestures.</li> <li>Three characters were introduced with their names only.</li> </ul>                                                                    | 12 exposures of 9 novel words per session, 45 minutes per session, a total of 3 sessions          | 4 weeks                  |
| Luke & Ritterfeld<br>(2014) | Vocabulary/Word Learning<br>(Artificial) | <ul style="list-style-type: none"> <li>One of 4 sets of 12 target words along with unfamiliar referent pictures were presented on a computer screen.</li> <li>After presenting the target words with pictures, asked to answer yes/no questions.</li> <li>Direct Instruction: instructed to remember the names and corresponding pictures.</li> <li>Indirect Instruction: no specific instructions provided regarding learning the names and corresponding pictures.</li> </ul> | 70 exposures, 12 novel target words, 60 minutes for one session                                   | 5-minute and 24-48 hours |
| Pomper et al.<br>(2022)     |                                          |                                                                                                                                                                                                                                                                                                                                                                                                                                                                                 |                                                                                                   |                          |
| Restrepo et al.<br>(2013)   | Vocabulary/Word Learning (Real)          | <ul style="list-style-type: none"> <li>Placed in a small group.</li> <li>Focus vocabulary words were presented through book activities along with manipulatives.</li> </ul>                                                                                                                                                                                                                                                                                                     | 45 focus words, 45 minutes per session, 4 days per week for 12 weeks                              | 12 weeks                 |

|                               |                                       |                                                                                                                                                                                                                                                                                                                     |                                                                                                                                                                                                                                                                                                                                   |                                                                                   |
|-------------------------------|---------------------------------------|---------------------------------------------------------------------------------------------------------------------------------------------------------------------------------------------------------------------------------------------------------------------------------------------------------------------|-----------------------------------------------------------------------------------------------------------------------------------------------------------------------------------------------------------------------------------------------------------------------------------------------------------------------------------|-----------------------------------------------------------------------------------|
|                               |                                       | <ul style="list-style-type: none"> <li>Engaged in various hands-on activities, story-retell, book making, acting, etc.</li> <li>English-only group: all instructions were presented in English.</li> <li>Spanish-English bilingual group: alternated instructions in Spanish or English every two weeks.</li> </ul> |                                                                                                                                                                                                                                                                                                                                   |                                                                                   |
| Rice et al. (1992)            | Vocabulary/Word Learning (Artificial) | <ul style="list-style-type: none"> <li>Watched two animated videos with the narration of target words at the sentence-final level in a story format.</li> <li>Pauses between the target words were added for the second and third sessions.</li> </ul>                                                              | 10 target words, 30 exposures per session, 15 minutes per sessions, a total of four sessions                                                                                                                                                                                                                                      | At least a day to no more than a week                                             |
| Riches (2004)                 | Vocabulary/Word Learning (Artificial) | <ul style="list-style-type: none"> <li>Engaged in performing and labeling target verbs with different objects in play activities.</li> <li>Experiment 1: four novel words</li> <li>Experiment 2: six novel words</li> </ul>                                                                                         | <ul style="list-style-type: none"> <li>Over a 4-week period</li> <li>Experiment 1 &amp; 2: <ul style="list-style-type: none"> <li>Massed 12: 12 exposures in a day.</li> <li>Massed 18: 18 exposures in a day.</li> <li>Spaced 12: 12 exposures over 4 days.</li> <li>Spaced 18: 18 exposures over 4 days.</li> </ul> </li> </ul> | Immediately after the intervention and a week after the last intervention session |
| Simon-Cereijido et al. (2013) | General Language Enrichment (Real)    | <ul style="list-style-type: none"> <li>Book reading and hands-on activities (e.g., pictures, manipulatives, etc.).</li> <li>Bilingual group: the language of instruction day was alternated each day.</li> </ul>                                                                                                    | 45 minutes per session, four days per week for 12 weeks                                                                                                                                                                                                                                                                           | 12 weeks                                                                          |
| Smeets et al. (2014)          | Vocabulary/Word Learning (Real)       | <ul style="list-style-type: none"> <li>Experiment 1: <ul style="list-style-type: none"> <li>Engaged in four different electronic storybooks without adult's support: two video and two static formats.</li> </ul> </li> </ul>                                                                                       | 10 minutes per session, two sessions per week for four weeks                                                                                                                                                                                                                                                                      | 4 weeks                                                                           |

- The video format included additional effects: zoom-in on details of the pictures and background music or sound based on the story elements and mood.
- No written text was provided while listening to the storybooks.
- Experiment 2:
  - Engaged in same four different electronic storybooks as Experiment 1 but presented in four conditions.
  - 1) static books without background music/sound
  - 2) static books with background music/sound
  - 3) video books without background music/sound
  - 4) video books with background music/sound

Grammatical  
Morphemes (Real)

- Engaged in whole-class and small-group activities.
- Three different activities in a small group varied from dress-up play, board games, to books.
- Model and general feedback were presented for both groups.
- Recasting group: when an error occurred, a correct answer was provided but the child does not have to reproduce it.
- Cueing group: when an error occurred, a hierarchy of cues was provided to elicit the correct respond from the child.

60 minutes per session, one session per week for eight weeks      8 weeks

Smith-Lock et  
al. (2015)

|                          |                                    |                                                                                                                                                                                                                                                                                                                                                                                                                                                                                                                                                                                                                                                                                                                                                 |                                                                                                                                                                                                                                                                                                         |                         |
|--------------------------|------------------------------------|-------------------------------------------------------------------------------------------------------------------------------------------------------------------------------------------------------------------------------------------------------------------------------------------------------------------------------------------------------------------------------------------------------------------------------------------------------------------------------------------------------------------------------------------------------------------------------------------------------------------------------------------------------------------------------------------------------------------------------------------------|---------------------------------------------------------------------------------------------------------------------------------------------------------------------------------------------------------------------------------------------------------------------------------------------------------|-------------------------|
| Storkel et al.<br>(2017) | Vocabulary/Word<br>Learning (Real) | <ul style="list-style-type: none"> <li>• Engaged in interactive book reading activities with a total of five books.</li> <li>• Pre-book reading: target words were presented with pictures, synonyms, and definitions.</li> <li>• Book reading: read the book together as a group.</li> <li>• Post-book reading: target words were presented with different pictures and in supportive context sentences.</li> <li>• Based on the intensity condition, children received different number of exposures for target words <ul style="list-style-type: none"> <li>○ 12 exposures, 24 exposures, 36 exposures, and 48 exposures</li> </ul> </li> </ul>                                                                                              | <p>30 target words, 20-30 minutes per session; average 2-3 sessions per week</p> <p>12 exposures: 10 sessions in 4-5 weeks</p> <p>24 exposures and 36 exposures: 15 sessions in 5-8 weeks</p> <p>48 exposures: 20 sessions in 7-10 weeks</p>                                                            | 5, 7, 8, or 10<br>weeks |
| Storkel et al.<br>(2019) | Vocabulary/Word<br>Learning (Real) | <ul style="list-style-type: none"> <li>• Engaged in interactive book reading activities with a total of five books (see above for Storkel et al., 2017 on pre- to post-book reading activities)</li> <li>• 4 X 9 group: <ul style="list-style-type: none"> <li>○ Four exposures to a target word per book reading</li> <li>○ Nine repeated readings of each book</li> </ul> </li> <li>• 6 X 6 group: <ul style="list-style-type: none"> <li>○ Six exposures to a target word per book reading</li> <li>○ Six repeated readings of each book</li> </ul> </li> <li>• 9 X 4 group: <ul style="list-style-type: none"> <li>○ Nine exposures to a target word per book reading</li> <li>○ Four repeated readings of each book</li> </ul> </li> </ul> | <p>Average two sessions per week</p> <p>4 X 9 group: average 13 minutes per session, a total of 23 sessions in 12 weeks</p> <p>6 X 6 group: average 14 minutes per session, a total of 15 sessions in 8 weeks</p> <p>9 x 4 group: average 16 minutes per session, a total of 10 sessions in 5 weeks</p> | 5, 8, or 12<br>weeks    |

---
