# Supplementary material
Source: publisher figshare collection journal article supplement (https://asha.figshare.com/articles/dataset/_/26170006)
Supplement: Supplementary file 2 [file 2]

## Supplemental Material S1. Search strings used by database.

| Database           | Search string                                                                                                                                                                                                                                                                                                                                                                                                                                                                                                                                                                                                                                                                                                                                                                                                  |
|--------------------|----------------------------------------------------------------------------------------------------------------------------------------------------------------------------------------------------------------------------------------------------------------------------------------------------------------------------------------------------------------------------------------------------------------------------------------------------------------------------------------------------------------------------------------------------------------------------------------------------------------------------------------------------------------------------------------------------------------------------------------------------------------------------------------------------------------|
| Psychinfo via OVID | ((teaching or training or treatment or "clinical trial" or intervention or therapy or rehabilitation or remediation) and group).mp. [mp=title, abstract, heading word, table of contents, key concepts, original title, tests & measures, mesh]((((language and (impair* or delay or disorder or disability)) or "language development disorder" or dysphasi* or "developmental communication disorder") and (child* or preschool*)) not (adult or deaf or autism* or "hearing impairment" or "Down syndrome" or "intellectual disability" or "traumatic brain injury" or "acquired brain injury" or seizure or disease or cleft)).mp. [mp=title, abstract, heading word, table of contents, key concepts, original title, tests & measures, mesh]                                                             |
| CINAHL             | ( ( ( language impairment or language disorder or specific language impairment or developmental language disorder ) OR language delay OR language disability OR dysphasia AND ( children or kids or youth or child ) NOT adults NOT ( autism or asd or autism spectrum disorder ) NOT cleft NOT ( deaf or hard of hearing or hearing impaired or d/hh ) NOT down syndrome NOT ( intellectual disability or mental retardation ) NOT ( brain injury or head injury or traumatic brain injury or acquired brain injury ) ) AND (S1 AND S2) ) NOT disease NOT seizures                                                                                                                                                                                                                                            |
| Medline via OVID   | ((teaching or training or treatment or "clinical trial" or intervention or therapy or rehabilitation or remediation) and group and (((language and (impair* or delay or disorder or disability)) or "language development disorder" or dysphasi* or "developmental communication disorder") and (child* or preschool*)) not (adult or deaf or autism* or "hearing impairment" or "Down syndrome" or "intellectual disability" or "traumatic brain injury" or "acquired brain injury" or seizure or disease or cleft))).mp. [mp=title, abstract, original title, name of substance word, subject heading word, floating sub-heading word, keyword heading word, organism supplementary concept word, protocol supplementary concept word, rare disease supplementary concept word, unique identifier, synonyms] |
| ERIC               | ((teaching OR training OR treatment OR "clinical trial" OR intervention OR therapy OR rehabilitation OR remediation) AND group AND (child OR preschool)) AND ((language AND (impair OR delay OR disability OR disorder)) OR (language development disorder) OR dysphasi OR (developmental communication disorders) NOT (deaf OR adult OR autism OR "hearing impairment" OR "Down Syndrome" OR intellectual disability OR seizure OR disease OR cleft OR brain injury))                                                                                                                                                                                                                                                                                                                                         |
| Web of Science     | TS = ((teaching or training or treatment or "clinical trial" or intervention or therapy or rehabilitation or remediation) AND group AND (((language AND (impair* or delay or disorder or disability) ) OR "language development disorder" OR dysphasi* OR "developmental communication disorder") AND (child* or preschool*) ) NOT (adult OR deaf OR autism* OR "hearing impairment" OR "Down syndrome" OR "intellectual                                                                                                                                                                                                                                                                                                                                                                                       |

|          |                                                                                                                                                                                                                                                                                                                                                                                                                                                                                                                             |
|----------|-----------------------------------------------------------------------------------------------------------------------------------------------------------------------------------------------------------------------------------------------------------------------------------------------------------------------------------------------------------------------------------------------------------------------------------------------------------------------------------------------------------------------------|
|          | disability" OR "traumatic brain injury" OR "acquired brain injury" OR seizure OR disease OR cleft) )) Indexes=SCI-EXPANDED, SSCI, A&HCI, CPCI-S, CPCI-SSH, BKCI-S, BKCI-SSH, ESCI, CCR-EXPANDED, IC Timespan=All years                                                                                                                                                                                                                                                                                                      |
| LLBA     | ((teaching OR training OR treatment OR "clinical trial" OR intervention OR therapy OR rehabilitation OR remediation) AND group AND (child OR preschool)) AND ((language AND (impair OR delay OR disability OR disorder)) OR (language development disorder) OR dysphasi OR (developmental communication disorders) NOT (deaf OR adult OR autism OR "hearing impairment" OR "Down Syndrome" OR intellectual disability OR seizure OR disease OR cleft OR brain injury))                                                      |
| ProQuest | not(((teaching or training or treatment or "clinical trial" or intervention or therapy or rehabilitation or remediation) and group) AND (((language and (impair* or delay or disorder or disability)) or "language development disorder" or dysphasi* or "developmental communication disorder") and (child* or preschool*)) not (adult or deaf or autism* or "hearing impairment" or "Down syndrome" or "intellectual disability" or "traumatic brain injury" or "acquired brain injury" or seizure or disease or cleft))) |
