# Supplementary material
Source: publisher figshare collection journal article supplement (https://asha.figshare.com/articles/dataset/_/26170006)
Supplement: Supplementary file 3 [file 2]

**Supplemental Material S4.** List of differences between the study protocol as registered in Open Science Framework in June 2021 and the completed study.

| Planned methods registered in protocol                                                         | Study as executed                                                                                                                                                                                                                                                                                                                                                  |
|------------------------------------------------------------------------------------------------|--------------------------------------------------------------------------------------------------------------------------------------------------------------------------------------------------------------------------------------------------------------------------------------------------------------------------------------------------------------------|
| Searches of conference proceedings were planned.                                               | Conference proceedings were not included. The scope of the search and number of references returned (14, 416), combined with the difficulty of searching relevant conference procedures, made this plan infeasible.                                                                                                                                                |
| At least 20% of screened studies were planned to be screened by a second reviewer.             | All studies (100%) were screened by two independent reviewers, and disagreements were resolved by a third reviewer.                                                                                                                                                                                                                                                |
| Application of the Newcastle-Ottawa Scale for assessing quality of cohort studies was planned. | Formal analysis of risk of bias was not conducted due to the heterogeneity in approaches to examining the predictors of treatment response across studies and to the Newcastle-Ottawa scale's design for cohort studies rather than for predictors of treatment response. Instead, a broad critical analysis of the literature is included in the published study. |
| Meta-analysis of results was considered.                                                       | Meta-analysis was deemed inappropriate due to the heterogeneity of studies in the results.                                                                                                                                                                                                                                                                         |
| No articles authored by members of the review team were anticipated to be included.            | Ebert & Pham (2023) was published during the review's search and extraction phase and was included in the review                                                                                                                                                                                                                                                   |
